# Supplementary material for: Mechanisms underlying the nucleation processes of mesoporous ceria nanoparticles
Source: Royal Society of Chemistry journal article supplement (doi:10.1039/d4nr01632g), 2024-01-01
Supplement: d4nr01632g1.pdf [file d4nr01632g1.pdf]

Supplementary Information

**Mechanisms underlying the nucleation processes of mesoporous ceria nanoparticles**

Jian He, Ling Zou, Lu Yang, Guangyou Shi, Jinbao Li, Run Huang, Xiaoling Liu,  
Shiwu Dong\* and Xiaochao Yang\*

School of Biomedical Engineering and Medical Imaging, Army Medical University,  
Chongqing 400038, China

\*E-mail: [dongshiwu@tmmu.edu.cn](mailto:dongshiwu@tmmu.edu.cn); [xcyang@tmmu.edu.cn](mailto:xcyang@tmmu.edu.cn)

## **Experimental Procedures**

### ***Procedures for the synthesis of I-MCNs***

The I-MCNs were synthesized by our previous method. In brief,  $\text{Ce}(\text{NO}_3)_3 \cdot 6\text{H}_2\text{O}$  (Acros, 99.5%) (1 mmol) and TOPO (Sigma-Aldrich, 99%) (1.2 mmol) were dissolved in ethanol (2 mL) and heated to 80 °C. The mixture was added 1-octadecene (ODE) (Acros, 90%) (5 mL) and heated to 180 °C for 30 min. After cooling to room temperature, the product was washed by ethanol and acetone for several times until the supernatant was clear. Finally, the synthesized I-MCNs were dispersed in toluene (10 mL) and stored at 4 °C. The conditions for the syntheses using other ligands including oleylamine (OAm), oleic acid (OAc) and oleyl alcohol (OAl) and solvents including octadecane (OAd), OAm, OAc and OAl were the same as that of TOPO and ODE respectively.

### ***Transmission electron microscopy (TEM) analysis***

The I-MCNs dispersed in toluene was dripped onto ultrathin carbon copper grid. The morphologies of the nanoparticles were observed on a Hitachi HT7700 TEM operated at 100 kV. The high-resolution images were observed on a FEI tecnai G2 F20 TEM operated at 200 kV. The selected area electron diffraction (SAED) analyses were performed using Gatan DigitalMicrograph 3.9 software.

### ***N<sub>2</sub> adsorption/desorption analysis***

The ceria nanoparticles were calcinated in air at 500 °C for 2 h. The samples were degassed at 300 °C for 2 h before testing. Then, they were backfilled with N<sub>2</sub> and weighted to get N<sub>2</sub> adsorption/desorption isotherms. Surface areas and pore diameters of the samples were analyzed by Brunauer-Emmett-Teller (BET) and Barrett-Joyner-Halenda (BJH) method respectively.

### ***X-ray diffraction (XRD) analysis***

The XRD spectra of the samples were obtained on a Bruker D8 X-ray diffractometer equipped with a Cu Ka radiation source operated at 40 kV and 40 mA using a scanning step of 0.02°. Averaged grain size was analyzed based on Scherrer Equation using Jade 6 software.

### ***Thermogravimetric (TG) analysis***

The TG samples were prepared by stirring Ce(NO<sub>3</sub>)<sub>3</sub>·6H<sub>2</sub>O (1 mmol), TOPO (0-3.0 mmol) and ethanol (2 mL) at 80 °C until the solution was clear. The samples were dyed at 80 °C for 30 min under vacuum condition until white solid or yellow oil products were formed. The TG curves were determined on a TA Q50 analyzer using a heating rate of 20 °C min<sup>-1</sup>. The results were analyzed on a TA Universal Analysis software and the graphs were transferred into derivative thermogravimetric (DTG) data.

### ***Electrospray ionization mass spectrometry (ESI-MS) analysis***

The ESI-MS samples were prepared by dissolving  $\text{Ce}(\text{NO}_3)_3 \cdot 6\text{H}_2\text{O}$  (1 mmol) and TOPO (0-3.0 mmol) in ethanol (2 mL) at room temperature. The samples were diluted 500 times by ethanol before running the tests. The mass to charge ratios were determined by a Bruker Impact II quadrupole time-of-flight (QTOF) mass spectrometer operated at 2 kV. The signals with intensity lower than 5% were excluded from the results.

### ***<sup>31</sup>P nuclear magnetic resonance (<sup>31</sup>P NMR) analysis***

The ligands in the solvent and adsorbed at the I-MCNs surfaces after the synthetic reaction were collected and analyzed by <sup>31</sup>P NMR. The ligands in the solvent were collected by extraction. After the synthesis, the reaction solution was added ethanol (20 mL) and the mixture was centrifuged to separate the supernatant. The ethanol in the supernatant was removed by rotary evaporation and extracted by methanol (5 mL) for three times to separate the ligands from ODE. The ethanol solvent was removed by rotary evaporation and the ligands were dispersed in  $\text{CDCl}_3$  (800  $\mu\text{L}$ ). The ligands adsorbed at the I-MCNs surface were collected by a ligand-exchange method. The I-MCNs dispersed in toluene were precipitated out by adding acetone and re-dispersed in THF (5 mL). The THF solution of I-MCNs was mixed with alendronate (100 mg) dissolved in  $\text{H}_2\text{O}$  (5 mL), and the mixture was stirred at 80 °C for 12 h. After cooling to room temperature, the upper organic layer was separated by centrifugation. The solvent was removed by rotary evaporation and the ligands were dissolved in  $\text{CDCl}_3$  (800  $\mu\text{L}$ ). One dimensional (1D) <sup>31</sup>P NMR spectra of the samples were recorded on an

Agilent Direct Drive 2 NMR spectrometer operated at frequency of 243 MHz.

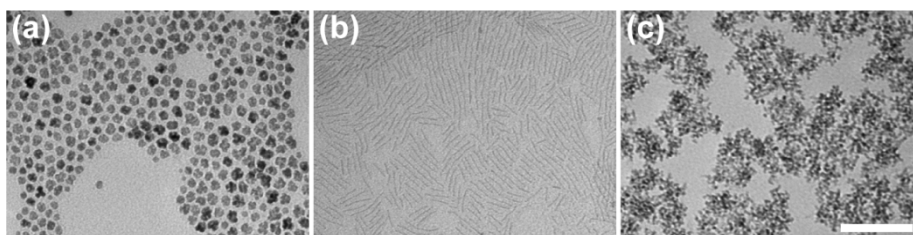

**Fig. S1.** TEM images of ceria synthesized using OAm, OAc and OAl as ligands respectively. All of the TEM images shared a same scale bar of 50 nm.

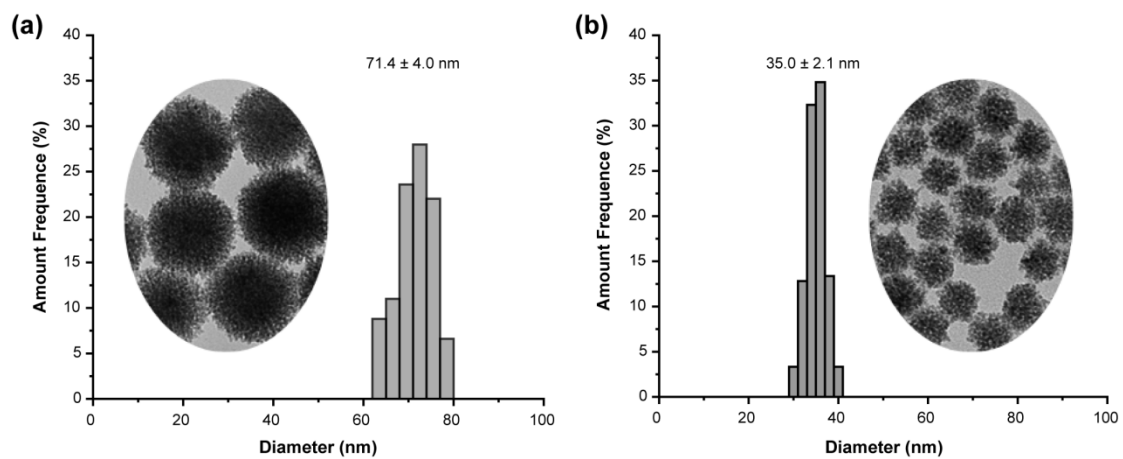

**Fig. S2.** The size distributions of I-MCNs synthesized with and without ethanol.

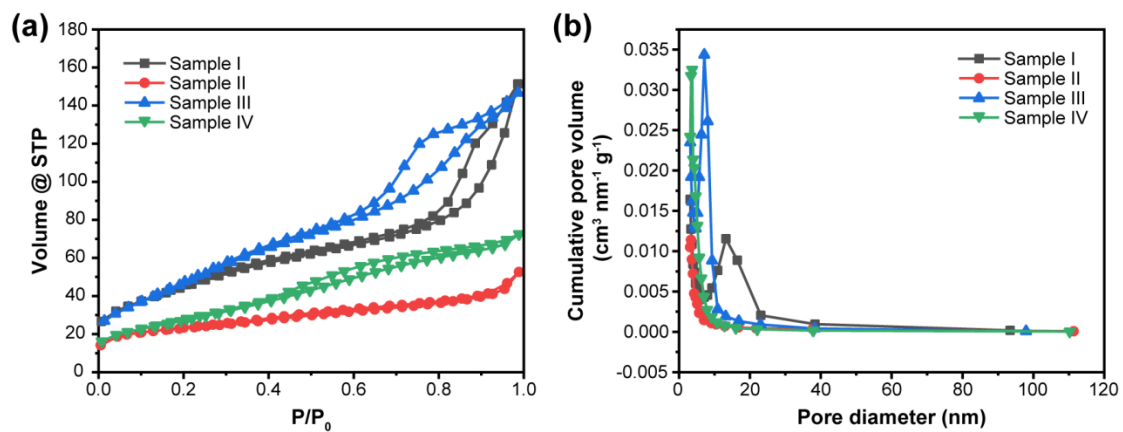

**Fig. S3.** The N<sub>2</sub> adsorption/desorption isotherms and pore diameter distribution of sample I, II, III and IV in Fig. 1.



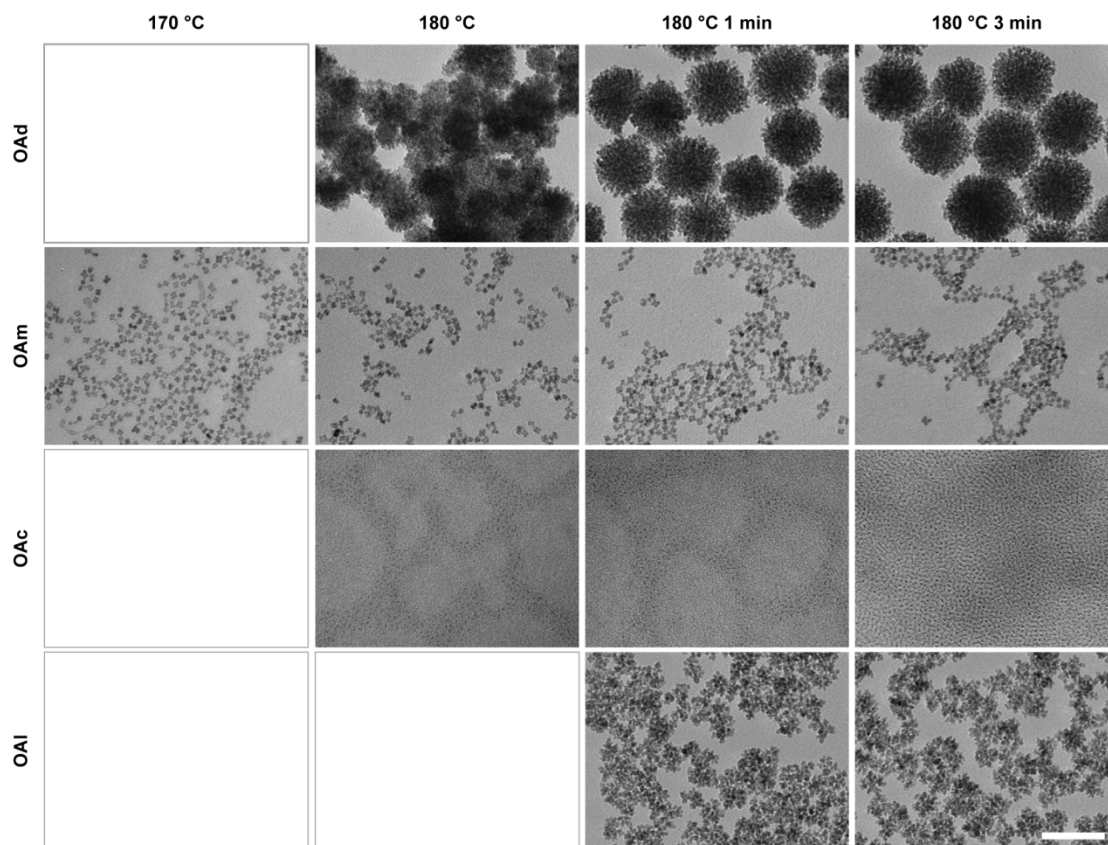

**Fig. S4.** TEM images of samples in the nucleation process with other solvents including OAd, OAm, OAc and OAl. All blank images represented that no samples were collected under this condition. All of the TEM images shared a same scale bar of 50 nm.

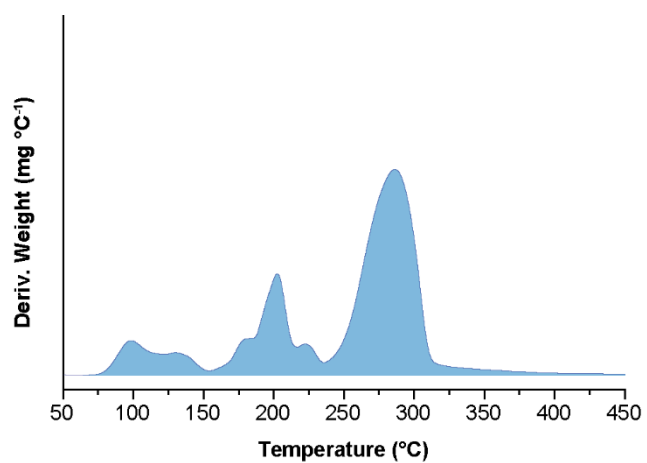

**Fig. S5.** The DTG graph of raw  $\text{Ce}(\text{NO}_3)_3 \cdot 6\text{H}_2\text{O}$ .

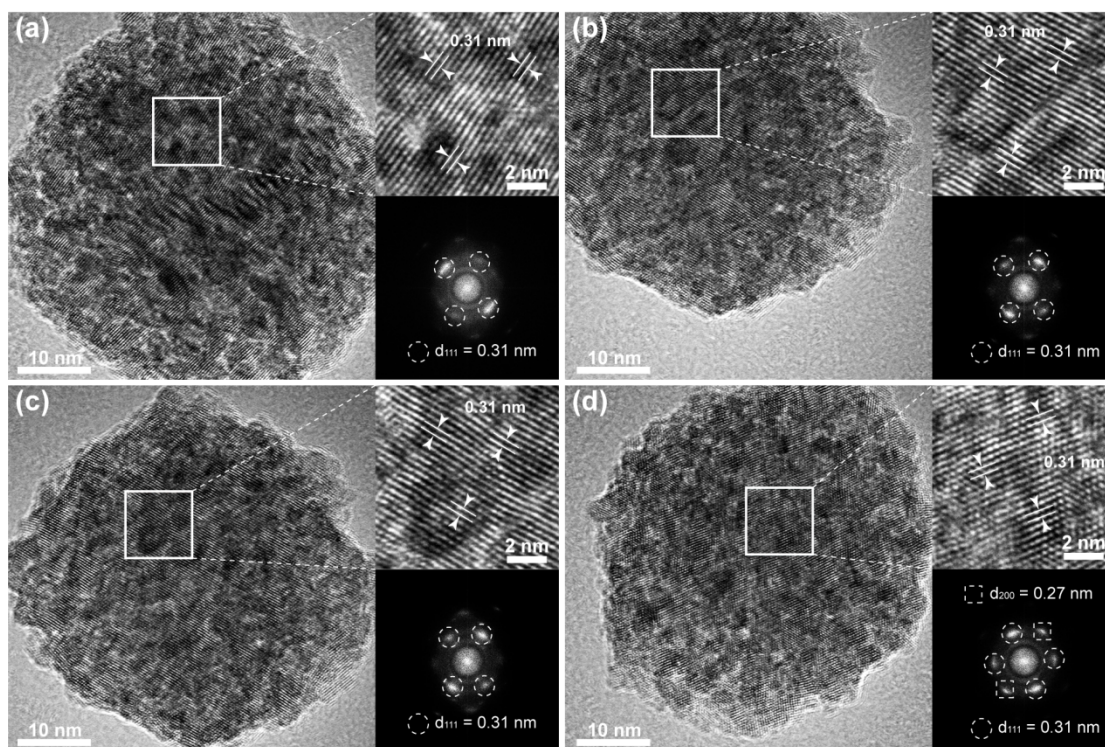

**Fig. S6.** HRTEM images of four I-MCNs showing the exposure of (111) plane at their surfaces.

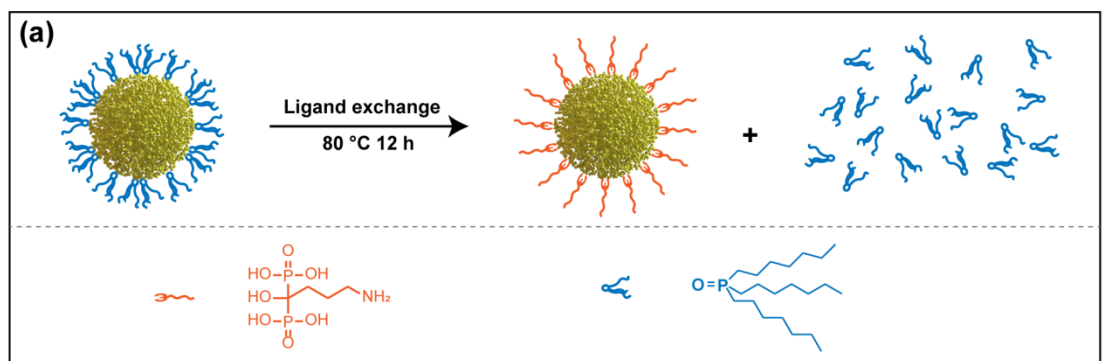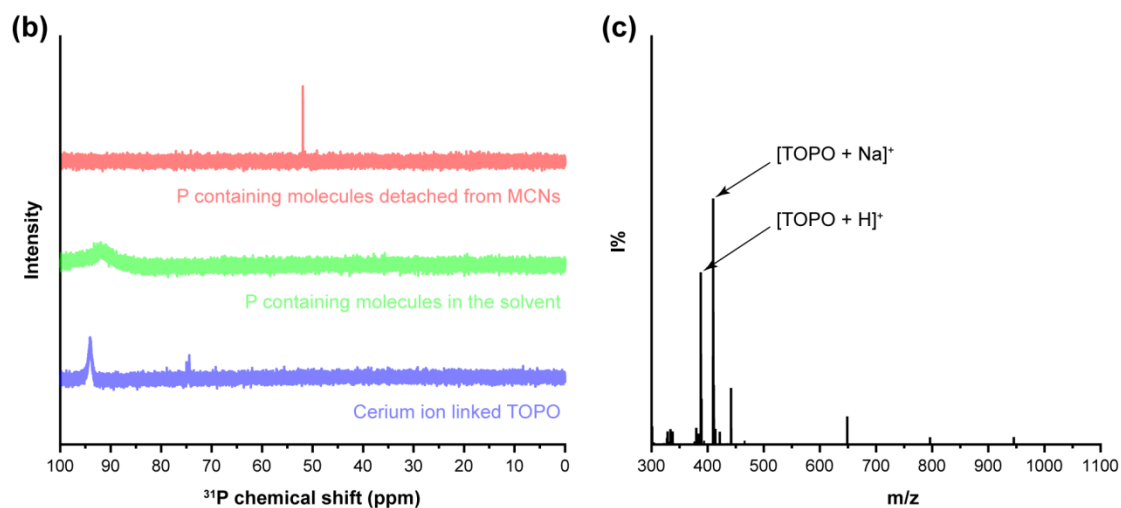

**Fig. S7.** (a) Schematic illustration of the ligand exchange between alendronate and TOPO. (b) The  $^{31}\text{P}$  spectra of cerium ion linked TOPO, molecules in the solvent, and molecules detached from the surface of I-MCNs. (c) The MS spectrum of molecules detached from I-MCNs.

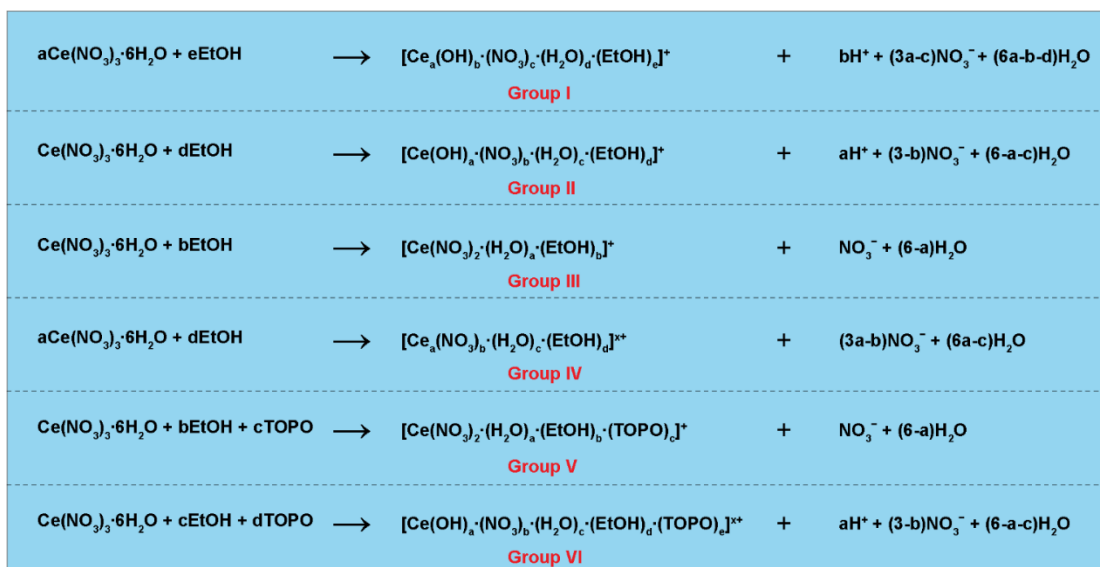

**Fig. S8.** Chemical reactions occurred ahead of ceria crystal nucleation.

**Table S1.** The specific surface areas of sample I, II, III and IV in Fig. 1

| Sample                                       | I   | II | III | IV  |
|----------------------------------------------|-----|----|-----|-----|
| Surface areas [ $\text{m}^2 \text{g}^{-1}$ ] | 164 | 77 | 182 | 100 |

**Table S2.** The grain sizes of samples shown in Fig. 2c-f

| Sample           | Fig. 2c | Fig. 2d | Fig. 2e | Fig. 2f |
|------------------|---------|---------|---------|---------|
| Grain sizes [nm] | 4.7     | 6.4     | 6.1     | 6.8     |

**Table S3.** Detected m/z and proposed molecular structures (TOPO/Ce<sup>3+</sup> = 0)

| Categories | Molecular formula                                                                                                                        | Molecular structures                                                                                                                     | m/z |
|------------|------------------------------------------------------------------------------------------------------------------------------------------|------------------------------------------------------------------------------------------------------------------------------------------|-----|
| I          | [Ce <sub>a</sub> (OH) <sub>b</sub> ·(NO <sub>3</sub> ) <sub>c</sub> ·(H <sub>2</sub> O) <sub>d</sub> ·(EtOH) <sub>e</sub> ] <sup>+</sup> | [Ce <sub>2</sub> (OH) <sub>2</sub> ·(NO <sub>3</sub> ) <sub>3</sub> ·(H <sub>2</sub> O) <sub>2</sub> ·(EtOH) <sub>5</sub> ] <sup>+</sup> | 766 |
| II         | [Ce(OH) <sub>a</sub> ·(NO <sub>3</sub> ) <sub>b</sub> ·(H <sub>2</sub> O) <sub>c</sub> ·(EtOH) <sub>d</sub> ] <sup>+</sup>               | [Ce(OH) <sub>2</sub> ·(H <sub>2</sub> O) <sub>3</sub> ·(EtOH) <sub>3</sub> ] <sup>+</sup>                                                | 366 |
|            |                                                                                                                                          | [Ce(OH) <sub>2</sub> ·(H <sub>2</sub> O)·(EtOH) <sub>4</sub> ] <sup>+</sup>                                                              | 376 |
|            |                                                                                                                                          | [Ce(OH)·(NO <sub>3</sub> )·(H <sub>2</sub> O) <sub>2</sub> ·(EtOH) <sub>3</sub> ] <sup>+</sup>                                           | 393 |
|            |                                                                                                                                          | [Ce(OH) <sub>2</sub> ·(H <sub>2</sub> O) <sub>2</sub> ·(EtOH) <sub>4</sub> ] <sup>+</sup>                                                | 394 |
| III        | [Ce(NO <sub>3</sub> ) <sub>2</sub> ·(H <sub>2</sub> O) <sub>a</sub> ·(EtOH) <sub>b</sub> ] <sup>+</sup>                                  | [Ce(NO <sub>3</sub> ) <sub>2</sub> ·(H <sub>2</sub> O)·(EtOH)] <sup>+</sup>                                                              | 328 |
|            |                                                                                                                                          | [Ce(NO <sub>3</sub> ) <sub>2</sub> ·(H <sub>2</sub> O) <sub>2</sub> ·(EtOH)] <sup>+</sup>                                                | 346 |
|            |                                                                                                                                          | [Ce(NO <sub>3</sub> ) <sub>2</sub> ·(EtOH) <sub>2</sub> ] <sup>+</sup>                                                                   | 356 |
|            |                                                                                                                                          | [Ce(NO <sub>3</sub> ) <sub>2</sub> ·(H <sub>2</sub> O) <sub>3</sub> ·(EtOH)] <sup>+</sup>                                                | 364 |
|            |                                                                                                                                          | [Ce(NO <sub>3</sub> ) <sub>2</sub> ·(H <sub>2</sub> O)·(EtOH) <sub>2</sub> ] <sup>+</sup>                                                | 374 |
|            |                                                                                                                                          | [Ce(NO <sub>3</sub> ) <sub>2</sub> ·(H <sub>2</sub> O) <sub>2</sub> ·(EtOH) <sub>2</sub> ] <sup>+</sup>                                  | 392 |
|            |                                                                                                                                          | [Ce(NO <sub>3</sub> ) <sub>2</sub> ·(H <sub>2</sub> O)·(EtOH) <sub>3</sub> ] <sup>+</sup>                                                | 420 |
| IV         | [Ce <sub>a</sub> (NO <sub>3</sub> ) <sub>b</sub> ·(H <sub>2</sub> O) <sub>c</sub> ·(EtOH) <sub>d</sub> ] <sup>x+</sup>                   | [Ce <sub>2</sub> (NO <sub>3</sub> ) <sub>4</sub> ·(H <sub>2</sub> O) <sub>4</sub> ·(EtOH) <sub>3</sub> ] <sup>2+</sup>                   | 369 |
|            |                                                                                                                                          | [Ce <sub>2</sub> (NO <sub>3</sub> ) <sub>4</sub> ·(H <sub>2</sub> O) <sub>6</sub> ·(EtOH) <sub>3</sub> ] <sup>2+</sup>                   | 387 |
|            |                                                                                                                                          | [Ce <sub>2</sub> (NO <sub>3</sub> ) <sub>5</sub> ·(H <sub>2</sub> O) <sub>2</sub> ·(EtOH) <sub>2</sub> ] <sup>+</sup>                    | 718 |
|            |                                                                                                                                          | [Ce <sub>2</sub> (NO <sub>3</sub> ) <sub>5</sub> ·(H <sub>2</sub> O) <sub>3</sub> ·(EtOH) <sub>2</sub> ] <sup>+</sup>                    | 736 |
|            |                                                                                                                                          | [Ce <sub>2</sub> (NO <sub>3</sub> ) <sub>5</sub> ·(H <sub>2</sub> O)·(EtOH) <sub>3</sub> ] <sup>+</sup>                                  | 746 |
|            |                                                                                                                                          | [Ce <sub>2</sub> (NO <sub>3</sub> ) <sub>5</sub> ·(H <sub>2</sub> O) <sub>2</sub> ·(EtOH) <sub>3</sub> ] <sup>+</sup>                    | 764 |



**Table S4.** Detected m/z and proposed molecular structures (TOPO/Ce<sup>3+</sup> = 0.4)

| Categories                                                                    | Molecular formula                                                                                    | Molecular structures                                                                      | m/z                                                                      |
|-------------------------------------------------------------------------------|------------------------------------------------------------------------------------------------------|-------------------------------------------------------------------------------------------|--------------------------------------------------------------------------|
| II                                                                            | $[\text{Ce}(\text{OH})_a(\text{NO}_3)_b(\text{H}_2\text{O})_c(\text{EtOH})_d]^+$                     | $[\text{Ce}(\text{OH})_2(\text{H}_2\text{O})\cdot(\text{EtOH})_4]^+$                      | 376                                                                      |
|                                                                               |                                                                                                      | $[\text{Ce}(\text{OH})_2(\text{H}_2\text{O})_2\cdot(\text{EtOH})_4]^+$                    | 394                                                                      |
| III                                                                           | $[\text{Ce}(\text{NO}_3)_2(\text{H}_2\text{O})_a(\text{EtOH})_b]^+$                                  | $[\text{Ce}(\text{NO}_3)_2\cdot(\text{EtOH})]^+$                                          | 310                                                                      |
|                                                                               |                                                                                                      | $[\text{Ce}(\text{NO}_3)_2(\text{H}_2\text{O})\cdot(\text{EtOH})]^+$                      | 328                                                                      |
|                                                                               |                                                                                                      | $[\text{Ce}(\text{NO}_3)_2(\text{H}_2\text{O})_2\cdot(\text{EtOH})]^+$                    | 346                                                                      |
|                                                                               |                                                                                                      | $[\text{Ce}(\text{NO}_3)_2\cdot(\text{EtOH})_2]^+$                                        | 356                                                                      |
|                                                                               |                                                                                                      | $[\text{Ce}(\text{NO}_3)_2(\text{H}_2\text{O})_3\cdot(\text{EtOH})]^+$                    | 364                                                                      |
|                                                                               |                                                                                                      | $[\text{Ce}(\text{NO}_3)_2(\text{H}_2\text{O})\cdot(\text{EtOH})_2]^+$                    | 374                                                                      |
|                                                                               |                                                                                                      | $[\text{Ce}(\text{NO}_3)_2(\text{H}_2\text{O})_2\cdot(\text{EtOH})_2]^+$                  | 392                                                                      |
|                                                                               |                                                                                                      | $[\text{Ce}(\text{NO}_3)_2\cdot(\text{EtOH})_3]^+$                                        | 402                                                                      |
|                                                                               |                                                                                                      | $[\text{Ce}(\text{NO}_3)_2(\text{H}_2\text{O})\cdot(\text{EtOH})_3]^+$                    | 420                                                                      |
|                                                                               |                                                                                                      | IV                                                                                        | $[\text{Ce}_a(\text{NO}_3)_b(\text{H}_2\text{O})_c(\text{EtOH})_d]^{x+}$ |
| $[\text{Ce}_2(\text{NO}_3)_4(\text{H}_2\text{O})_5\cdot(\text{EtOH})_3]^{2+}$ | 378                                                                                                  |                                                                                           |                                                                          |
| VI                                                                            | $[\text{Ce}(\text{OH})_a(\text{NO}_3)_b(\text{H}_2\text{O})_c(\text{EtOH})_d(\text{TOPO})_e]^x$<br>+ | $[\text{Ce}(\text{OH})\cdot(\text{H}_2\text{O})_3\cdot(\text{TOPO})_3]^{2+}$              | 686                                                                      |
|                                                                               |                                                                                                      | $[\text{Ce}(\text{OH})\cdot(\text{NO}_3)\cdot(\text{H}_2\text{O})_5\cdot(\text{TOPO})]^+$ | 696                                                                      |
|                                                                               |                                                                                                      | $[\text{Ce}(\text{OH})\cdot(\text{NO}_3)\cdot(\text{H}_2\text{O})_6\cdot(\text{TOPO})]^+$ | 714                                                                      |

**Table S5.** Detected m/z and proposed molecular structures (TOPO/Ce<sup>3+</sup> = 0.8)

| Categories | Molecular formula                                                                                                                                | Molecular structures                                                                                                   | m/z  |
|------------|--------------------------------------------------------------------------------------------------------------------------------------------------|------------------------------------------------------------------------------------------------------------------------|------|
| II         | [Ce(OH) <sub>a</sub> ·(NO <sub>3</sub> ) <sub>b</sub> ·(H <sub>2</sub> O) <sub>c</sub> ·(EtOH) <sub>d</sub> ] <sup>+</sup>                       | [Ce(OH) <sub>2</sub> ·(H <sub>2</sub> O)·(EtOH) <sub>4</sub> ] <sup>+</sup>                                            | 376  |
|            |                                                                                                                                                  | [Ce(OH) <sub>2</sub> ·(H <sub>2</sub> O) <sub>2</sub> ·(EtOH) <sub>4</sub> ] <sup>+</sup>                              | 394  |
| III        | [Ce(NO <sub>3</sub> ) <sub>2</sub> ·(H <sub>2</sub> O) <sub>a</sub> ·(EtOH) <sub>b</sub> ] <sup>+</sup>                                          | [Ce(NO <sub>3</sub> ) <sub>2</sub> ·(EtOH)] <sup>+</sup>                                                               | 310  |
|            |                                                                                                                                                  | [Ce(NO <sub>3</sub> ) <sub>2</sub> ·(H <sub>2</sub> O)·(EtOH)] <sup>+</sup>                                            | 328  |
|            |                                                                                                                                                  | [Ce(NO <sub>3</sub> ) <sub>2</sub> ·(H <sub>2</sub> O) <sub>2</sub> ·(EtOH)] <sup>+</sup>                              | 346  |
|            |                                                                                                                                                  | [Ce(NO <sub>3</sub> ) <sub>2</sub> ·(EtOH) <sub>2</sub> ] <sup>+</sup>                                                 | 356  |
|            |                                                                                                                                                  | [Ce(NO <sub>3</sub> ) <sub>2</sub> ·(H <sub>2</sub> O) <sub>3</sub> ·(EtOH)] <sup>+</sup>                              | 364  |
|            |                                                                                                                                                  | [Ce(NO <sub>3</sub> ) <sub>2</sub> ·(H <sub>2</sub> O)·(EtOH) <sub>2</sub> ] <sup>+</sup>                              | 374  |
|            |                                                                                                                                                  | [Ce(NO <sub>3</sub> ) <sub>2</sub> ·(H <sub>2</sub> O) <sub>2</sub> ·(EtOH) <sub>2</sub> ] <sup>+</sup>                | 392  |
|            |                                                                                                                                                  | [Ce(NO <sub>3</sub> ) <sub>2</sub> ·(EtOH) <sub>3</sub> ] <sup>+</sup>                                                 | 402  |
| IV         | [Ce <sub>a</sub> (NO <sub>3</sub> ) <sub>b</sub> ·(H <sub>2</sub> O) <sub>c</sub> ·(EtOH) <sub>d</sub> ] <sup>x+</sup>                           | [Ce(NO <sub>3</sub> ) <sub>2</sub> ·(H <sub>2</sub> O)·(EtOH) <sub>3</sub> ] <sup>+</sup>                              | 420  |
|            |                                                                                                                                                  | [Ce <sub>2</sub> (NO <sub>3</sub> ) <sub>4</sub> ·(H <sub>2</sub> O) <sub>3</sub> ·(EtOH) <sub>3</sub> ] <sup>2+</sup> | 360  |
|            |                                                                                                                                                  | [Ce <sub>2</sub> (NO <sub>3</sub> ) <sub>4</sub> ·(H <sub>2</sub> O) <sub>5</sub> ·(EtOH) <sub>3</sub> ] <sup>2+</sup> | 378  |
|            |                                                                                                                                                  | [Ce <sub>2</sub> (NO <sub>3</sub> ) <sub>4</sub> ·(H <sub>2</sub> O)·(EtOH) <sub>5</sub> ] <sup>2+</sup>               | 388  |
| V          | [Ce(NO <sub>3</sub> ) <sub>2</sub> ·(H <sub>2</sub> O) <sub>a</sub> ·(EtOH) <sub>b</sub> ·(TOPO) <sub>c</sub> ] <sup>+</sup>                     | [Ce <sub>2</sub> (NO <sub>3</sub> ) <sub>4</sub> ·(H <sub>2</sub> O) <sub>3</sub> ·(EtOH) <sub>5</sub> ] <sup>2+</sup> | 406  |
|            |                                                                                                                                                  | [Ce(NO <sub>3</sub> ) <sub>2</sub> ·(H <sub>2</sub> O)·(EtOH)·(TOPO)] <sup>+</sup>                                     | 715  |
| VI         | [Ce(OH) <sub>a</sub> ·(NO <sub>3</sub> ) <sub>b</sub> ·(H <sub>2</sub> O) <sub>c</sub> ·(EtOH) <sub>d</sub> ·(TOPO) <sub>e</sub> ] <sup>x+</sup> | [Ce(NO <sub>3</sub> ) <sub>2</sub> ·(H <sub>2</sub> O)·(EtOH) <sub>8</sub> ·(TOPO)] <sup>+</sup>                       | 1037 |
|            |                                                                                                                                                  | [Ce(OH)·(H <sub>2</sub> O)·(TOPO) <sub>3</sub> ] <sup>2+</sup>                                                         | 668  |
|            |                                                                                                                                                  | [Ce(OH)·(H <sub>2</sub> O) <sub>3</sub> ·(TOPO) <sub>3</sub> ] <sup>2+</sup>                                           | 686  |
|            |                                                                                                                                                  | [Ce(OH)·(NO <sub>3</sub> )·(H <sub>2</sub> O) <sub>5</sub> ·(TOPO)] <sup>+</sup>                                       | 696  |
|            |                                                                                                                                                  | [Ce(OH)·(NO <sub>3</sub> )·(H <sub>2</sub> O) <sub>6</sub> ·(TOPO)] <sup>+</sup>                                       | 714  |
|            |                                                                                                                                                  | [Ce(OH)·(NO <sub>3</sub> )·(H <sub>2</sub> O)·(EtOH) <sub>2</sub> ·(TOPO)] <sup>+</sup>                                | 716  |
|            |                                                                                                                                                  | [Ce(OH)·(EtOH) <sub>3</sub> ·(TOPO) <sub>3</sub> ] <sup>2+</sup>                                                       | 728  |

**Table S6.** Detected m/z and proposed molecular structures (TOPO/Ce<sup>3+</sup> = 1.2)

| Categories                                                        | Molecular formula                                                                                                                            | Molecular structures                                                                                                 | m/z  |
|-------------------------------------------------------------------|----------------------------------------------------------------------------------------------------------------------------------------------|----------------------------------------------------------------------------------------------------------------------|------|
| I                                                                 | [Ce <sub>a</sub> (OH) <sub>b</sub> (NO <sub>3</sub> ) <sub>c</sub> (H <sub>2</sub> O) <sub>d</sub> (EtOH) <sub>e</sub> ] <sup>+</sup>        | [Ce <sub>2</sub> (OH)(NO <sub>3</sub> ) <sub>4</sub> (EtOH) <sub>4</sub> ] <sup>+</sup>                              | 729  |
| II                                                                | [Ce(OH) <sub>a</sub> (NO <sub>3</sub> ) <sub>b</sub> (H <sub>2</sub> O) <sub>c</sub> (EtOH) <sub>d</sub> ] <sup>+</sup>                      | [Ce(OH) <sub>2</sub> (H <sub>2</sub> O)(EtOH) <sub>4</sub> ] <sup>+</sup>                                            | 376  |
|                                                                   |                                                                                                                                              | [Ce(OH) <sub>2</sub> (H <sub>2</sub> O) <sub>2</sub> (EtOH) <sub>4</sub> ] <sup>+</sup>                              | 394  |
| III                                                               | [Ce(NO <sub>3</sub> ) <sub>2</sub> (H <sub>2</sub> O) <sub>a</sub> (EtOH) <sub>b</sub> ] <sup>+</sup>                                        | [Ce(NO <sub>3</sub> ) <sub>2</sub> (EtOH)] <sup>+</sup>                                                              | 310  |
|                                                                   |                                                                                                                                              | [Ce(NO <sub>3</sub> ) <sub>2</sub> (H <sub>2</sub> O)(EtOH)] <sup>+</sup>                                            | 328  |
|                                                                   |                                                                                                                                              | [Ce(NO <sub>3</sub> ) <sub>2</sub> (H <sub>2</sub> O) <sub>2</sub> (EtOH)] <sup>+</sup>                              | 346  |
|                                                                   |                                                                                                                                              | [Ce(NO <sub>3</sub> ) <sub>2</sub> (EtOH) <sub>2</sub> ] <sup>+</sup>                                                | 356  |
|                                                                   |                                                                                                                                              | [Ce(NO <sub>3</sub> ) <sub>2</sub> (H <sub>2</sub> O) <sub>3</sub> (EtOH)] <sup>+</sup>                              | 364  |
|                                                                   |                                                                                                                                              | [Ce(NO <sub>3</sub> ) <sub>2</sub> (H <sub>2</sub> O)(EtOH) <sub>2</sub> ] <sup>+</sup>                              | 374  |
|                                                                   |                                                                                                                                              | [Ce(NO <sub>3</sub> ) <sub>2</sub> (H <sub>2</sub> O) <sub>2</sub> (EtOH) <sub>2</sub> ] <sup>+</sup>                | 392  |
|                                                                   |                                                                                                                                              | [Ce(NO <sub>3</sub> ) <sub>2</sub> (EtOH) <sub>3</sub> ] <sup>+</sup>                                                | 402  |
| IV                                                                | [Ce <sub>a</sub> (NO <sub>3</sub> ) <sub>b</sub> (H <sub>2</sub> O) <sub>c</sub> (EtOH) <sub>d</sub> ] <sup>x+</sup>                         | [Ce(NO <sub>3</sub> ) <sub>2</sub> (H <sub>2</sub> O)(EtOH) <sub>3</sub> ] <sup>+</sup>                              | 420  |
|                                                                   |                                                                                                                                              | [Ce <sub>2</sub> (NO <sub>3</sub> ) <sub>4</sub> (H <sub>2</sub> O) <sub>3</sub> (EtOH) <sub>3</sub> ] <sup>2+</sup> | 360  |
|                                                                   |                                                                                                                                              | [Ce <sub>2</sub> (NO <sub>3</sub> ) <sub>4</sub> (H <sub>2</sub> O) <sub>5</sub> (EtOH) <sub>3</sub> ] <sup>2+</sup> | 378  |
| V                                                                 | [Ce(NO <sub>3</sub> ) <sub>2</sub> (H <sub>2</sub> O) <sub>a</sub> (EtOH) <sub>b</sub> (TOPO) <sub>c</sub> ] <sup>+</sup>                    | [Ce <sub>2</sub> (NO <sub>3</sub> ) <sub>4</sub> (H <sub>2</sub> O) <sub>3</sub> (EtOH) <sub>5</sub> ] <sup>2+</sup> | 406  |
|                                                                   |                                                                                                                                              | [Ce(NO <sub>3</sub> ) <sub>2</sub> (H <sub>2</sub> O) <sub>2</sub> (TOPO)] <sup>+</sup>                              | 687  |
|                                                                   |                                                                                                                                              | [Ce(NO <sub>3</sub> ) <sub>2</sub> (EtOH)(TOPO)] <sup>+</sup>                                                        | 697  |
|                                                                   |                                                                                                                                              | [Ce(NO <sub>3</sub> ) <sub>2</sub> (H <sub>2</sub> O)(EtOH)(TOPO)] <sup>+</sup>                                      | 715  |
| VI                                                                | [Ce(OH) <sub>a</sub> (NO <sub>3</sub> ) <sub>b</sub> (H <sub>2</sub> O) <sub>c</sub> (EtOH) <sub>d</sub> (TOPO) <sub>e</sub> ] <sup>x+</sup> | [Ce(NO <sub>3</sub> ) <sub>2</sub> (H <sub>2</sub> O) <sub>8</sub> (TOPO)] <sup>+</sup>                              | 1037 |
|                                                                   |                                                                                                                                              | [Ce(NO <sub>3</sub> ) <sub>2</sub> (TOPO) <sub>2</sub> ] <sup>+</sup>                                                | 1038 |
|                                                                   |                                                                                                                                              | [Ce(OH)(H <sub>2</sub> O)(TOPO) <sub>3</sub> ] <sup>2+</sup>                                                         | 668  |
|                                                                   |                                                                                                                                              | [Ce(OH)(H <sub>2</sub> O) <sub>3</sub> (TOPO) <sub>3</sub> ] <sup>2+</sup>                                           | 686  |
|                                                                   |                                                                                                                                              | [Ce(OH)(NO <sub>3</sub> )(H <sub>2</sub> O) <sub>2</sub> (EtOH)(TOPO)] <sup>+</sup>                                  | 688  |
|                                                                   |                                                                                                                                              | [Ce(OH)(NO <sub>3</sub> )(H <sub>2</sub> O) <sub>5</sub> (TOPO)] <sup>+</sup>                                        | 696  |
|                                                                   |                                                                                                                                              | [Ce(OH)(H <sub>2</sub> O) <sub>2</sub> (EtOH)(TOPO) <sub>3</sub> ] <sup>2+</sup>                                     | 700  |
|                                                                   |                                                                                                                                              | [Ce(OH)(NO <sub>3</sub> )(H <sub>2</sub> O) <sub>6</sub> (TOPO)] <sup>+</sup>                                        | 714  |
|                                                                   |                                                                                                                                              | [Ce(OH)(NO <sub>3</sub> )(H <sub>2</sub> O)(EtOH) <sub>2</sub> (TOPO)] <sup>+</sup>                                  | 716  |
|                                                                   |                                                                                                                                              | [Ce(OH)(EtOH) <sub>3</sub> (TOPO) <sub>3</sub> ] <sup>2+</sup>                                                       | 728  |
| [Ce(OH)(NO <sub>3</sub> )(EtOH)(TOPO) <sub>2</sub> ] <sup>+</sup> | 1039                                                                                                                                         |                                                                                                                      |      |
| [Ce(OH)(EtOH) <sub>3</sub> (TOPO) <sub>5</sub> ] <sup>2+</sup>    | 1115                                                                                                                                         |                                                                                                                      |      |

**Table S7.** Detected m/z and proposed molecular structures (TOPO/Ce<sup>3+</sup> = 1.6)

| Categories                                                                | Molecular formula                                                                                                              | Molecular structures                                                                                                | m/z  |
|---------------------------------------------------------------------------|--------------------------------------------------------------------------------------------------------------------------------|---------------------------------------------------------------------------------------------------------------------|------|
| I                                                                         | $[\text{Ce}_a(\text{OH})_b \cdot (\text{NO}_3)_c \cdot (\text{H}_2\text{O})_d \cdot (\text{EtOH})_e]^+$                        | $[\text{Ce}_2(\text{OH}) \cdot (\text{NO}_3)_4 \cdot (\text{EtOH})_4]^+$                                            | 729  |
|                                                                           |                                                                                                                                | $[\text{Ce}_2(\text{OH})_2 \cdot (\text{NO}_3)_3 \cdot (\text{EtOH})_5]^+$                                          | 730  |
|                                                                           |                                                                                                                                | $[\text{Ce}_3(\text{OH}) \cdot (\text{NO}_3)_7 \cdot (\text{H}_2\text{O})_6 \cdot (\text{EtOH})_3]^+$               | 1117 |
| II                                                                        | $[\text{Ce}(\text{OH})_a \cdot (\text{NO}_3)_b \cdot (\text{H}_2\text{O})_c \cdot (\text{EtOH})_d]^+$                          | $[\text{Ce}(\text{OH})_2 \cdot (\text{H}_2\text{O}) \cdot (\text{EtOH})_4]^+$                                       | 376  |
| III                                                                       | $[\text{Ce}(\text{NO}_3)_2 \cdot (\text{H}_2\text{O})_a \cdot (\text{EtOH})_b]^+$                                              | $[\text{Ce}(\text{NO}_3)_2 \cdot (\text{H}_2\text{O}) \cdot (\text{EtOH})]^+$                                       | 328  |
|                                                                           |                                                                                                                                | $[\text{Ce}(\text{NO}_3)_2 \cdot (\text{H}_2\text{O})_2 \cdot (\text{EtOH})]^+$                                     | 346  |
|                                                                           |                                                                                                                                | $[\text{Ce}(\text{NO}_3)_2 \cdot (\text{EtOH})_2]^+$                                                                | 356  |
|                                                                           |                                                                                                                                | $[\text{Ce}(\text{NO}_3)_2 \cdot (\text{H}_2\text{O})_3 \cdot (\text{EtOH})]^+$                                     | 364  |
|                                                                           |                                                                                                                                | $[\text{Ce}(\text{NO}_3)_2 \cdot (\text{H}_2\text{O}) \cdot (\text{EtOH})_2]^+$                                     | 374  |
|                                                                           |                                                                                                                                | $[\text{Ce}(\text{NO}_3)_2 \cdot (\text{H}_2\text{O})_2 \cdot (\text{EtOH})_2]^+$                                   | 392  |
|                                                                           |                                                                                                                                | $[\text{Ce}(\text{NO}_3)_2 \cdot (\text{EtOH})_3]^+$                                                                | 402  |
| IV                                                                        | $[\text{Ce}_a(\text{NO}_3)_b \cdot (\text{H}_2\text{O})_c \cdot (\text{EtOH})_d]^{x+}$                                         | $[\text{Ce}_2(\text{NO}_3)_4 \cdot (\text{H}_2\text{O})_3 \cdot (\text{EtOH})_5]^{2+}$                              | 406  |
|                                                                           |                                                                                                                                | $[\text{Ce}_3(\text{NO}_3)_8 \cdot (\text{H}_2\text{O})_6 \cdot (\text{EtOH})_2]^+$                                 | 1116 |
| V                                                                         | $[\text{Ce}(\text{NO}_3)_2 \cdot (\text{H}_2\text{O})_a \cdot (\text{EtOH})_b \cdot (\text{TOPO})_c]^+$                        | $[\text{Ce}(\text{NO}_3)_2 \cdot (\text{H}_2\text{O})_2 \cdot (\text{TOPO})]^+$                                     | 687  |
|                                                                           |                                                                                                                                | $[\text{Ce}(\text{NO}_3)_2 \cdot (\text{EtOH}) \cdot (\text{TOPO})]^+$                                              | 697  |
|                                                                           |                                                                                                                                | $[\text{Ce}(\text{NO}_3)_2 \cdot (\text{H}_2\text{O}) \cdot (\text{EtOH}) \cdot (\text{TOPO})]^+$                   | 715  |
|                                                                           |                                                                                                                                | $[\text{Ce}(\text{NO}_3)_2 \cdot (\text{H}_2\text{O}) \cdot (\text{EtOH})_8 \cdot (\text{TOPO})]^+$                 | 1037 |
|                                                                           |                                                                                                                                | $[\text{Ce}(\text{NO}_3)_2 \cdot (\text{TOPO})_2]^+$                                                                | 1038 |
| VI                                                                        | $[\text{Ce}(\text{OH})_a \cdot (\text{NO}_3)_b \cdot (\text{H}_2\text{O})_c \cdot (\text{EtOH})_d \cdot (\text{TOPO})_e]^{x+}$ | $[\text{Ce}(\text{OH}) \cdot (\text{H}_2\text{O}) \cdot (\text{TOPO})_3]^{2+}$                                      | 668  |
|                                                                           |                                                                                                                                | $[\text{Ce}(\text{OH}) \cdot (\text{H}_2\text{O})_3 \cdot (\text{TOPO})_3]^{2+}$                                    | 686  |
|                                                                           |                                                                                                                                | $[\text{Ce}(\text{OH}) \cdot (\text{NO}_3) \cdot (\text{H}_2\text{O})_5 \cdot (\text{TOPO})]^+$                     | 696  |
|                                                                           |                                                                                                                                | $[\text{Ce}(\text{OH}) \cdot (\text{NO}_3) \cdot (\text{H}_2\text{O})_6 \cdot (\text{TOPO})]^+$                     | 714  |
|                                                                           |                                                                                                                                | $[\text{Ce}(\text{OH}) \cdot (\text{NO}_3) \cdot (\text{H}_2\text{O}) \cdot (\text{EtOH})_2 \cdot (\text{TOPO})]^+$ | 716  |
|                                                                           |                                                                                                                                | $[\text{Ce}(\text{OH}) \cdot (\text{EtOH})_3 \cdot (\text{TOPO})_3]^{2+}$                                           | 728  |
|                                                                           |                                                                                                                                | $[\text{Ce}(\text{OH}) \cdot (\text{NO}_3) \cdot (\text{H}_2\text{O})_5 \cdot (\text{EtOH}) \cdot (\text{TOPO})]^+$ | 742  |
|                                                                           |                                                                                                                                | $[\text{Ce}(\text{OH}) \cdot (\text{H}_2\text{O})_2 \cdot (\text{EtOH})_3 \cdot (\text{TOPO})_3]^{2+}$              | 746  |
|                                                                           |                                                                                                                                | $[\text{Ce}(\text{OH}) \cdot (\text{H}_2\text{O}) \cdot (\text{EtOH})_6 \cdot (\text{TOPO})_3]^{2+}$                | 806  |
|                                                                           |                                                                                                                                | $[\text{Ce}(\text{OH}) \cdot (\text{NO}_3) \cdot (\text{EtOH}) \cdot (\text{TOPO})_2]^+$                            | 1039 |
| $[\text{Ce}(\text{OH}) \cdot (\text{EtOH})_3 \cdot (\text{TOPO})_5]^{2+}$ | 1115                                                                                                                           |                                                                                                                     |      |

**Table S8.** Detected m/z and proposed molecular structures (TOPO/Ce<sup>3+</sup> = 2.0)

| Categories | Molecular formula                                                                                                                            | Molecular structures                                                                                                    | m/z  |
|------------|----------------------------------------------------------------------------------------------------------------------------------------------|-------------------------------------------------------------------------------------------------------------------------|------|
| I          | [Ce <sub>a</sub> (OH) <sub>b</sub> (NO <sub>3</sub> ) <sub>c</sub> (H <sub>2</sub> O) <sub>d</sub> (EtOH) <sub>e</sub> ] <sup>+</sup>        | [Ce <sub>2</sub> (OH)(NO <sub>3</sub> ) <sub>2</sub> (EtOH) <sub>5</sub> ] <sup>2+</sup>                                | 334  |
|            |                                                                                                                                              | [Ce <sub>2</sub> (OH) <sub>2</sub> (NO <sub>3</sub> ) <sub>2</sub> (EtOH) <sub>7</sub> ] <sup>2+</sup>                  | 380  |
|            |                                                                                                                                              | [Ce <sub>2</sub> (OH)(NO <sub>3</sub> ) <sub>4</sub> (EtOH) <sub>3</sub> ] <sup>+</sup>                                 | 683  |
|            |                                                                                                                                              | [Ce <sub>2</sub> (OH)(NO <sub>3</sub> ) <sub>4</sub> (H <sub>2</sub> O)(EtOH) <sub>3</sub> ] <sup>+</sup>               | 701  |
|            |                                                                                                                                              | [Ce <sub>2</sub> (OH) <sub>2</sub> (NO <sub>3</sub> ) <sub>3</sub> (H <sub>2</sub> O)(EtOH) <sub>4</sub> ] <sup>+</sup> | 702  |
|            |                                                                                                                                              | [Ce <sub>2</sub> (OH)(NO <sub>3</sub> ) <sub>4</sub> (EtOH) <sub>4</sub> ] <sup>+</sup>                                 | 729  |
|            |                                                                                                                                              | [Ce <sub>2</sub> (OH) <sub>2</sub> (NO <sub>3</sub> ) <sub>3</sub> (EtOH) <sub>5</sub> ] <sup>+</sup>                   | 730  |
|            |                                                                                                                                              | [Ce <sub>2</sub> (OH) <sub>3</sub> (NO <sub>3</sub> ) <sub>2</sub> (EtOH) <sub>6</sub> ] <sup>+</sup>                   | 731  |
|            |                                                                                                                                              | [Ce <sub>2</sub> (OH)(NO <sub>3</sub> ) <sub>4</sub> (H <sub>2</sub> O)(EtOH) <sub>4</sub> ] <sup>+</sup>               | 747  |
|            |                                                                                                                                              | [Ce <sub>2</sub> (OH) <sub>2</sub> (NO <sub>3</sub> ) <sub>3</sub> (H <sub>2</sub> O)(EtOH) <sub>5</sub> ] <sup>+</sup> | 748  |
|            |                                                                                                                                              | [Ce <sub>3</sub> (OH)(NO <sub>3</sub> ) <sub>7</sub> (H <sub>2</sub> O) <sub>6</sub> (EtOH) <sub>3</sub> ] <sup>+</sup> | 1117 |
| II         | [Ce(OH) <sub>a</sub> (NO <sub>3</sub> ) <sub>b</sub> (H <sub>2</sub> O) <sub>c</sub> (EtOH) <sub>d</sub> ] <sup>+</sup>                      | [Ce(OH)(NO <sub>3</sub> )(H <sub>2</sub> O) <sub>2</sub> (EtOH)] <sup>+</sup>                                           | 301  |
|            |                                                                                                                                              | [Ce(OH)(NO <sub>3</sub> )(H <sub>2</sub> O)(EtOH) <sub>2</sub> ] <sup>+</sup>                                           | 329  |
|            |                                                                                                                                              | [Ce(OH) <sub>2</sub> (H <sub>2</sub> O) <sub>2</sub> (EtOH) <sub>3</sub> ] <sup>+</sup>                                 | 348  |
|            |                                                                                                                                              | [Ce(OH) <sub>2</sub> (H <sub>2</sub> O) <sub>3</sub> (EtOH) <sub>3</sub> ] <sup>+</sup>                                 | 366  |
| III        | [Ce(NO <sub>3</sub> ) <sub>2</sub> (H <sub>2</sub> O) <sub>a</sub> (EtOH) <sub>b</sub> ] <sup>+</sup>                                        | [Ce(NO <sub>3</sub> ) <sub>2</sub> (H <sub>2</sub> O)(EtOH)] <sup>+</sup>                                               | 328  |
|            |                                                                                                                                              | [Ce(NO <sub>3</sub> ) <sub>2</sub> (H <sub>2</sub> O) <sub>2</sub> (EtOH)] <sup>+</sup>                                 | 346  |
|            |                                                                                                                                              | [Ce(NO <sub>3</sub> ) <sub>2</sub> (H <sub>2</sub> O) <sub>3</sub> (EtOH)] <sup>+</sup>                                 | 364  |
|            |                                                                                                                                              | [Ce(NO <sub>3</sub> ) <sub>2</sub> (H <sub>2</sub> O)(EtOH) <sub>2</sub> ] <sup>+</sup>                                 | 374  |
|            |                                                                                                                                              | [Ce(NO <sub>3</sub> ) <sub>2</sub> (H <sub>2</sub> O) <sub>2</sub> (EtOH) <sub>2</sub> ] <sup>+</sup>                   | 392  |
|            |                                                                                                                                              | [Ce(NO <sub>3</sub> ) <sub>2</sub> (H <sub>2</sub> O)(EtOH) <sub>3</sub> ] <sup>+</sup>                                 | 420  |
|            |                                                                                                                                              | [Ce(NO <sub>3</sub> ) <sub>2</sub> (H <sub>2</sub> O) <sub>2</sub> (EtOH) <sub>3</sub> ] <sup>+</sup>                   | 438  |
| IV         | [Ce <sub>a</sub> (NO <sub>3</sub> ) <sub>b</sub> (H <sub>2</sub> O) <sub>c</sub> (EtOH) <sub>d</sub> ] <sup>x+</sup>                         | [Ce <sub>2</sub> (NO <sub>3</sub> ) <sub>4</sub> (H <sub>2</sub> O) <sub>3</sub> (EtOH)] <sup>2+</sup>                  | 314  |
|            |                                                                                                                                              | [Ce <sub>2</sub> (NO <sub>3</sub> ) <sub>4</sub> (H <sub>2</sub> O) <sub>5</sub> (EtOH)] <sup>2+</sup>                  | 332  |
|            |                                                                                                                                              | [Ce <sub>2</sub> (NO <sub>3</sub> ) <sub>4</sub> (H <sub>2</sub> O) <sub>7</sub> (EtOH)] <sup>2+</sup>                  | 350  |
|            |                                                                                                                                              | [Ce <sub>2</sub> (NO <sub>3</sub> ) <sub>4</sub> (H <sub>2</sub> O) <sub>3</sub> (EtOH) <sub>3</sub> ] <sup>2+</sup>    | 360  |
|            |                                                                                                                                              | [Ce <sub>2</sub> (NO <sub>3</sub> ) <sub>4</sub> (H <sub>2</sub> O) <sub>5</sub> (EtOH) <sub>3</sub> ] <sup>2+</sup>    | 378  |
|            |                                                                                                                                              | [Ce <sub>2</sub> (NO <sub>3</sub> ) <sub>4</sub> (H <sub>2</sub> O) <sub>6</sub> (EtOH) <sub>3</sub> ] <sup>2+</sup>    | 387  |
|            |                                                                                                                                              | [Ce <sub>2</sub> (NO <sub>3</sub> ) <sub>4</sub> (H <sub>2</sub> O) <sub>7</sub> (EtOH) <sub>3</sub> ] <sup>2+</sup>    | 396  |
|            |                                                                                                                                              | [Ce <sub>2</sub> (NO <sub>3</sub> ) <sub>4</sub> (H <sub>2</sub> O) <sub>3</sub> (EtOH) <sub>5</sub> ] <sup>2+</sup>    | 406  |
|            |                                                                                                                                              | [Ce <sub>3</sub> (NO <sub>3</sub> ) <sub>8</sub> (H <sub>2</sub> O) <sub>6</sub> (EtOH) <sub>2</sub> ] <sup>+</sup>     | 1116 |
|            |                                                                                                                                              | [Ce <sub>3</sub> (NO <sub>3</sub> ) <sub>8</sub> (H <sub>2</sub> O)(EtOH) <sub>4</sub> ] <sup>+</sup>                   | 1118 |
| V          | [Ce(NO <sub>3</sub> ) <sub>2</sub> (H <sub>2</sub> O) <sub>a</sub> (EtOH) <sub>b</sub> (TOPO) <sub>c</sub> ] <sup>+</sup>                    | [Ce(NO <sub>3</sub> ) <sub>2</sub> (H <sub>2</sub> O)(TOPO)] <sup>+</sup>                                               | 669  |
|            |                                                                                                                                              | [Ce(NO <sub>3</sub> ) <sub>2</sub> (H <sub>2</sub> O) <sub>2</sub> (TOPO)] <sup>+</sup>                                 | 687  |
|            |                                                                                                                                              | [Ce(NO <sub>3</sub> ) <sub>2</sub> (H <sub>2</sub> O)(EtOH)(TOPO)] <sup>+</sup>                                         | 715  |
|            |                                                                                                                                              | [Ce(NO <sub>3</sub> ) <sub>2</sub> (H <sub>2</sub> O)(EtOH) <sub>3</sub> (TOPO)] <sup>+</sup>                           | 807  |
|            |                                                                                                                                              | [Ce(NO <sub>3</sub> ) <sub>2</sub> (H <sub>2</sub> O)(EtOH) <sub>8</sub> (TOPO)] <sup>+</sup>                           | 1037 |
|            |                                                                                                                                              | [Ce(NO <sub>3</sub> ) <sub>2</sub> (TOPO) <sub>2</sub> ] <sup>+</sup>                                                   | 1038 |
| VI         | [Ce(OH) <sub>a</sub> (NO <sub>3</sub> ) <sub>b</sub> (H <sub>2</sub> O) <sub>c</sub> (EtOH) <sub>d</sub> (TOPO) <sub>e</sub> ] <sup>x+</sup> | [Ce(OH)(H <sub>2</sub> O)(TOPO) <sub>3</sub> ] <sup>2+</sup>                                                            | 668  |
|            |                                                                                                                                              | [Ce(OH)(NO <sub>3</sub> )(H <sub>2</sub> O)(EtOH)(TOPO)] <sup>+</sup>                                                   | 670  |
|            |                                                                                                                                              | [Ce(OH)(EtOH)(TOPO) <sub>3</sub> ] <sup>2+</sup>                                                                        | 682  |
|            |                                                                                                                                              | [Ce(OH)(H <sub>2</sub> O) <sub>3</sub> (TOPO) <sub>3</sub> ] <sup>2+</sup>                                              | 686  |

---

|                                                                                                             |      |
|-------------------------------------------------------------------------------------------------------------|------|
| $[\text{Ce}(\text{OH})\cdot(\text{NO}_3)\cdot(\text{H}_2\text{O})_2\cdot(\text{EtOH})\cdot(\text{TOPO})]^+$ | 688  |
| $[\text{Ce}(\text{OH})\cdot(\text{NO}_3)\cdot(\text{H}_2\text{O})_5\cdot(\text{TOPO})]^+$                   | 696  |
| $[\text{Ce}(\text{OH})\cdot(\text{H}_2\text{O})_2\cdot(\text{EtOH})\cdot(\text{TOPO})_3]^{2+}$              | 700  |
| $[\text{Ce}(\text{OH})\cdot(\text{H}_2\text{O})_5\cdot(\text{TOPO})_3]^{2+}$                                | 704  |
| $[\text{Ce}(\text{OH})\cdot(\text{NO}_3)\cdot(\text{H}_2\text{O})_6\cdot(\text{TOPO})]^+$                   | 714  |
| $[\text{Ce}(\text{OH})\cdot(\text{EtOH})_3\cdot(\text{TOPO})_3]^{2+}$                                       | 728  |
| $[\text{Ce}(\text{OH})\cdot(\text{H}_2\text{O})_2\cdot(\text{EtOH})_3\cdot(\text{TOPO})_3]^{2+}$            | 746  |
| $[\text{Ce}(\text{OH})\cdot(\text{H}_2\text{O})\cdot(\text{EtOH})_6\cdot(\text{TOPO})_3]^{2+}$              | 806  |
| $[\text{Ce}(\text{OH})\cdot(\text{NO}_3)\cdot(\text{H}_2\text{O})\cdot(\text{EtOH})_4\cdot(\text{TOPO})]^+$ | 808  |
| $[\text{Ce}(\text{OH})\cdot(\text{NO}_3)\cdot(\text{EtOH})\cdot(\text{TOPO})_2]^+$                          | 1039 |
| $[\text{Ce}(\text{OH})_2\cdot(\text{EtOH})_2\cdot(\text{TOPO})_2]^+$                                        | 1040 |
| $[\text{Ce}(\text{OH})\cdot(\text{EtOH})_3\cdot(\text{TOPO})_3]^{2+}$                                       | 1115 |

---

**Table S9.** Detected m/z and proposed molecular structures (TOPO/Ce<sup>3+</sup> = 3.0)

| Categories | Molecular formula                                                                                                                                    | Molecular structures                                                                                     | m/z  |
|------------|------------------------------------------------------------------------------------------------------------------------------------------------------|----------------------------------------------------------------------------------------------------------|------|
| III        | [Ce(NO <sub>3</sub> ) <sub>2</sub> ·(H <sub>2</sub> O) <sub>a</sub> ·(EtOH) <sub>b</sub> ] <sup>+</sup>                                              | [Ce(NO <sub>3</sub> ) <sub>2</sub> ·(H <sub>2</sub> O) <sub>10</sub> ·(EtOH) <sub>2</sub> ] <sup>+</sup> | 536  |
|            |                                                                                                                                                      | [Ce(NO <sub>3</sub> ) <sub>2</sub> ·(H <sub>2</sub> O)·(EtOH)·(TOPO)] <sup>+</sup>                       | 715  |
| V          | [Ce(NO <sub>3</sub> ) <sub>2</sub> ·(H <sub>2</sub> O) <sub>a</sub> ·(EtOH) <sub>b</sub> ·(TOPO) <sub>c</sub> ] <sup>+</sup>                         | [Ce(NO <sub>3</sub> ) <sub>2</sub> ·(H <sub>2</sub> O)·(EtOH) <sub>8</sub> ·(TOPO)] <sup>+</sup>         | 1037 |
|            |                                                                                                                                                      | [Ce(NO <sub>3</sub> ) <sub>2</sub> ·(TOPO) <sub>2</sub> ] <sup>+</sup>                                   | 1038 |
|            |                                                                                                                                                      | [Ce(OH)·(H <sub>2</sub> O) <sub>5</sub> ·(EtOH) <sub>4</sub> ·(TOPO)] <sup>2+</sup>                      | 409  |
|            |                                                                                                                                                      | [Ce(OH)·(H <sub>2</sub> O) <sub>3</sub> ·(TOPO) <sub>3</sub> ] <sup>2+</sup>                             | 686  |
|            |                                                                                                                                                      | [Ce(OH)·(NO <sub>3</sub> )·(H <sub>2</sub> O) <sub>5</sub> ·(TOPO)] <sup>+</sup>                         | 696  |
| VI         | [Ce(OH) <sub>a</sub> ·(NO <sub>3</sub> ) <sub>b</sub> ·(H <sub>2</sub> O) <sub>c</sub> ·(EtOH) <sub>d</sub> ·(TOPO) <sub>e</sub> ] <sup>x</sup><br>+ | [Ce(OH)·(NO <sub>3</sub> )·(H <sub>2</sub> O) <sub>6</sub> ·(TOPO)] <sup>+</sup>                         | 714  |
|            |                                                                                                                                                      | [Ce(OH)·(NO <sub>3</sub> )·(H <sub>2</sub> O)·(EtOH) <sub>2</sub> ·(TOPO)] <sup>+</sup>                  | 716  |
|            |                                                                                                                                                      | [Ce(OH)·(NO <sub>3</sub> )·(EtOH)·(TOPO) <sub>2</sub> ] <sup>+</sup>                                     | 1039 |
|            |                                                                                                                                                      | [Ce(OH) <sub>2</sub> ·(EtOH) <sub>2</sub> ·(TOPO) <sub>2</sub> ] <sup>+</sup>                            | 1040 |
|            |                                                                                                                                                      | [Ce(OH)·(EtOH) <sub>3</sub> ·(TOPO) <sub>3</sub> ] <sup>2+</sup>                                         | 1115 |
